# Supplementary material for: Mn doped CoP nanoparticle clusters: an efficient electrocatalyst for hydrogen evolution reaction
Source: Royal Society of Chemistry journal article supplement (doi:10.1039/c8cy01105b), 2018-01-01
Supplement: c8cy01105b1.pdf [file c8cy01105b1.pdf]

*Supporting Information for*

**Mn doped CoP nanoparticle clusters: an efficient  
electrocatalyst for hydrogen evolution reaction**

Xiumin Li<sup>a,b</sup>, Shasha Li<sup>c,d</sup>, Akihiro Yoshida<sup>b,c</sup>, Suchada Sirisomboonchai<sup>b</sup>, Keyong Tang<sup>a</sup>,  
Zhiyun Zuo<sup>d</sup>, Xiaogang Hao<sup>d</sup>, Abuliti Abudula<sup>b</sup>, Guoqing Guan<sup>b,c\*</sup>

---

<sup>a</sup> *School of Materials Science and Engineering, Zhengzhou University, Zhengzhou 450001, (P. R. China)*

<sup>b</sup> *Graduate School of Science and Technology, Hirosaki University, 1-Bunkyocho, Hirosaki 036-8560 (Japan)*

<sup>c</sup> *Energy Conversion Engineering Lab, Institute of Regional Innovation, Hirosaki University, 2-1-3 Matsubara, Aomori 030-0813 (Japan).*

<sup>d</sup> *Department of Chemical Engineering, Taiyuan University of Technology, Taiyuan, Shanxi 030024, (P. R. China)*

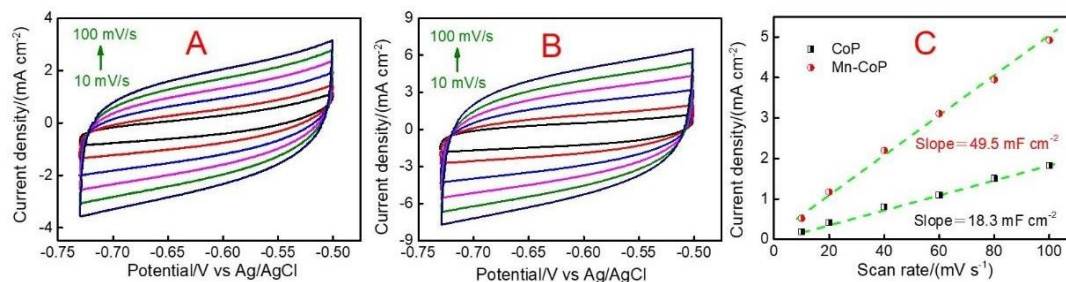

**Fig. S1** CVs of Mn-CoP and CoP catalysts (A, B) between the potential region of -0.5 V to -0.73 V (Ag/AgCl) with scan rates of 10, 20, 40, 60, 80 and 100 mV/s in a 1 M KOH solution.

The anodic charging currents measured at -0.6 V vs Ag/AgCl plotted as a function of scan rate (C). The determined double-layer capacitance of the system is taken as the average of the absolute value of the slope of the linear fits to the data

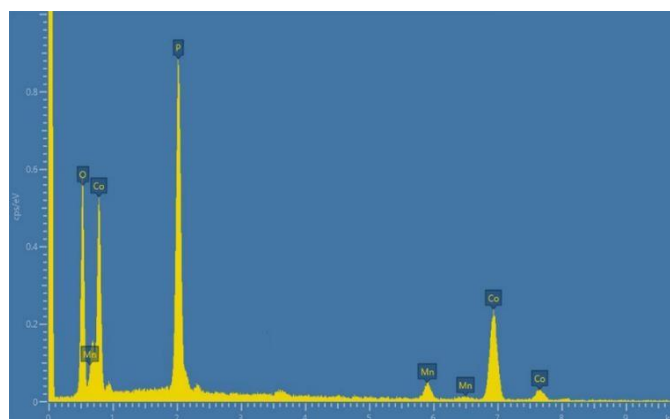

**Fig. S2** EDX spectra of Mn-CoP materials

All the spectra peaks of Mn, Co, P elements were revealed obviously. A strong peak of O element was due to that some phosphide species on the material surface were oxidized to phosphates in the air.

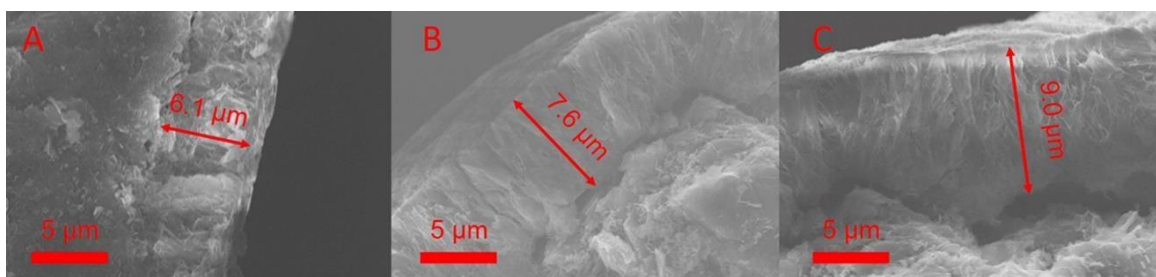

**Fig. S3** SEM images of Mn-CoP catalysts prepared at the pulse cycles of 400, 600, and 800 times.

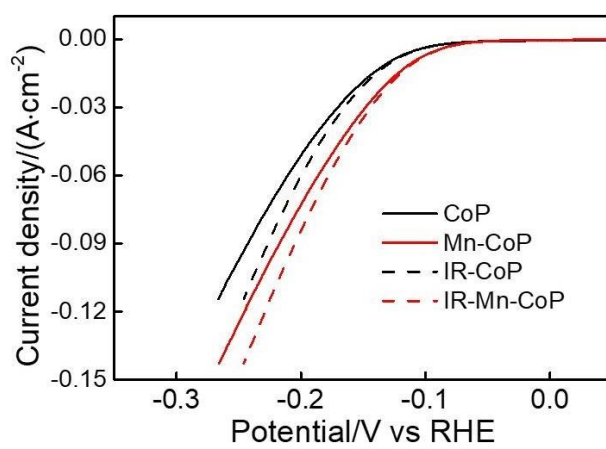

**Fig. S4** Original and IR-corrected polarization curves of CoP and Mn-CoP catalysts

---

The influence of material type of counter electrode on the HER activity was presented in Fig. S1. It is found that there is only a slight difference in catalytic activity for Pt wire and carbon rod counter electrodes.

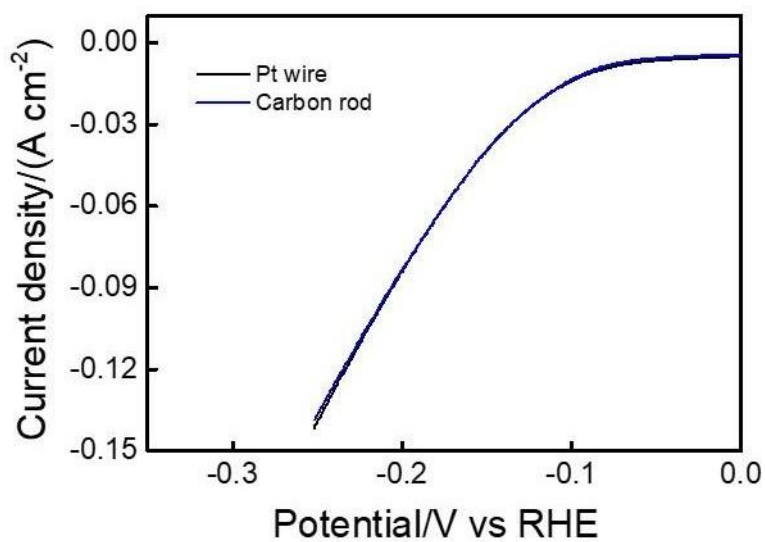

**Fig. S5** Polarization curves of Mn-CoP measured in the 1 M KOH solution where Pt wire or carbon rod was used as the counter electrode.

**Table S1.** Summary of HER performance of representative catalysts\*.

| Catalyst                                           | Substrate    | 10 (mV) | Tafel slope (mV/dec) | Electrolyte                           | Citation Information                         |
|----------------------------------------------------|--------------|---------|----------------------|---------------------------------------|----------------------------------------------|
| Ni <sub>12</sub> P <sub>5</sub> -Ni <sub>2</sub> P | Ni foam      | 120     | 79.1                 | 0.5 M H <sub>2</sub> SO <sub>4</sub>  | Angew. Chem. Int. Ed. 2015, 54, 8188–8192    |
| Mn-Ni <sub>2</sub> P                               | Nickel foam  | <103    | 135                  | 1 M NaOH                              | Chem. Commun, 2017, 53(80): 11048-11051.     |
| Ni <sub>2</sub> P                                  | Ti foil      | 117     | 46                   | 0.50 M H <sub>2</sub> SO <sub>4</sub> | J. Am. Chem. Soc. 2013, 135, 9267-9270.      |
| CoP                                                | Carbon cloth | 67      | 51                   | 0.50 M H <sub>2</sub> SO <sub>4</sub> | J. Am. Chem. Soc. 2014, 136, 7587-7590.      |
| CoP/CNTs                                           | GCE          | 139     | 52                   | 0.50 M H <sub>2</sub> SO <sub>4</sub> | Small, 2017, 13, 1602873                     |
| CoP/CNTs                                           | GCE          | 122     | 54                   | 0.50 M H <sub>2</sub> SO <sub>4</sub> | Angew. Chem. Int. Ed. 2014, 53, 6710-6714.   |
| Ni-Mo nanopowder                                   | Ti foil      | 79      |                      | 1 M NaOH                              | ACS Catal. 2013, 3, 166-169.                 |
| Bulk Mo <sub>2</sub> C                             | Carbon paste | 208     | 56                   | 0.50 M H <sub>2</sub> SO <sub>4</sub> | Angew. Chem. Int. Ed. 2012, 51, 12703-12706. |
| Bulk MoB                                           | Carbon paste | 212     | 55                   | 0.50 M H <sub>2</sub> SO <sub>4</sub> |                                              |
| Mo <sub>2</sub> N–MoC                              | GCE          | 157     | 68                   | 1 M NaOH                              | Adv. Mater. 2018, 30, 1704156                |
|                                                    |              | 154     | 55                   | 0.50 M H <sub>2</sub> SO <sub>4</sub> |                                              |
| Mo <sub>2</sub> C/CNTs                             | Carbon paper | 149     | 55.2                 | 0.1 M HClO <sub>4</sub>               | Energ. Environ. Sci. 2013, 6, 943-951.       |
| Mo <sub>1</sub> Soy                                | Carbon paper | 177     | 66.4                 | 0.1 M HClO <sub>4</sub>               | Energ. Environ. Sci. 2013, 6, 1818-1826.     |
| Mo <sub>1</sub> Soy-RGO                            | Carbon paper | 109     | 62.7                 | 0.1 M HClO <sub>4</sub>               |                                              |
| Mo <sub>2</sub> C/C                                | Carbon paper | 311     | 87.6                 | 0.1 M HClO <sub>4</sub>               |                                              |
| Co <sub>0.6</sub> Mo <sub>1.4</sub> N <sub>2</sub> | GCE          | 202     |                      | 0.1M HClO <sub>4</sub>                | J. Am. Chem. Soc. 2013, 135, 19186-19192     |

|                                               |                  |     |       |                                      |                                               |
|-----------------------------------------------|------------------|-----|-------|--------------------------------------|-----------------------------------------------|
| MoS <sub>3</sub> (33%)/MW CNT-NC              | Silver electrode | 206 | 40    | 1 M H <sub>2</sub> SO <sub>4</sub>   | Appl. Catal. B-Environ. 2013, 134-135, 75-82. |
| Core-shell MoO <sub>3</sub> -MoS <sub>2</sub> | FTO              | 254 | 50-60 | 0.5 M H <sub>2</sub> SO <sub>4</sub> | Nano. Lett. 2011, 11, 4168-4175.              |
| Defect-rich MoS <sub>2</sub> nanosheets       | GCE              | 190 | 50    | 0.5 M H <sub>2</sub> SO <sub>4</sub> | Adv. Mater. 2013, 25, 5807-5813.              |
| MoS <sub>2</sub>                              | Carbon cloth     | 191 | 64    | 0.5 M H <sub>2</sub> SO <sub>4</sub> | Adv. Mater. 2017, 29, 1703863                 |
| MoS <sub>2</sub> @Au                          | Au electrode     | 226 | 69    | 0.5 M H <sub>2</sub> SO <sub>4</sub> | Energ. Environ. Sci. 2013, 6, 625-633.        |
| amorphous MoS <sub>3</sub>                    | GCE              | 211 | 40    | 1 M H <sub>2</sub> SO <sub>4</sub>   | Chem. Sci. 2011, 2, 1262-1267.                |
| MoS <sub>2</sub> /RGO hybrid                  | GCE              | 154 | 41    | 0.5M H <sub>2</sub> SO <sub>4</sub>  | J. Am. Chem. Soc. 2011, 133, 7296-7299.       |
| MoS <sub>2</sub> /MGF                         | GCE              | 146 | 42    | 0.5 M H <sub>2</sub> SO <sub>4</sub> | Adv. Funct. Mater. 2013, 23, 5326-5333.       |
| MoS <sub>2</sub> /CNTs                        | Glass carbon     | 184 | 44.6  | 0.5 M H <sub>2</sub> SO <sub>4</sub> | Nanoscale 2013, 5, 7768-7771.                 |
| Cu <sub>2</sub> MoS <sub>4</sub>              | GCE              | 321 | 95    | pH 0 H <sub>2</sub> SO <sub>4</sub>  | Energ. Environ. Sci. 2012, 5, 8912-8916.      |
| WS <sub>2</sub> /RGO                          | GCE              | 265 | 58    | 0.5M H <sub>2</sub> SO <sub>4</sub>  | Angew. Chem. Int. Ed. 2013, 52, 13751-13754   |
| WS nanosheets                                 | GCE              | 233 | 55    | 0.5 M H <sub>2</sub> SO <sub>4</sub> | Nat. Mater. 2013, 12, 850-855.                |
| WS <sub>2</sub> nanosheets                    | GCE              | 151 | 72    | 1 M H <sub>2</sub> SO <sub>4</sub>   | Appl. Catal. B-Environ. 2012, 125, 59-66.     |
| Cobalt-sulfide                                | FTO              | 165 | 93    | 1.0MpH7PBS                           | J. Am. Chem. Soc. 2013, 135, 17699-17702      |
| NiWS <sub>x</sub>                             | FTO              | 373 | 96    | pH 7 PBS                             | Energ. Environ. Sci. 2013, 6, 2452-2459.      |
| CoWS <sub>x</sub>                             | FTO              | 271 | 78    | pH 7 PBS                             |                                               |

|                                                       |     |       |      |                                      |                                                |
|-------------------------------------------------------|-----|-------|------|--------------------------------------|------------------------------------------------|
| CoMoS <sub>x</sub>                                    | FTO | 241   | 85   | pH 7 PBS                             |                                                |
| FeS <sub>2</sub>                                      | GCE | 192.6 | 62.5 | 0.5 M H <sub>2</sub> SO <sub>4</sub> | Energ. Environ.<br>Sci. 2013, 6, 3553-<br>3558 |
| FeSe <sub>2</sub>                                     | GCE |       | 65.3 | 0.5 M H <sub>2</sub> SO <sub>4</sub> |                                                |
| Fe <sub>0.43</sub> Co <sub>0.57</sub> S <sub>2</sub>  | GCE | 264   | 55.9 | 0.5 M H <sub>2</sub> SO <sub>4</sub> |                                                |
| CoS <sub>2</sub>                                      | GCE | 232   | 44.6 | 0.5 M H <sub>2</sub> SO <sub>4</sub> |                                                |
| CoSe <sub>2</sub>                                     | GCE | 231   | 42.4 | 0.5 M H <sub>2</sub> SO <sub>4</sub> |                                                |
| Co <sub>0.56</sub> Ni <sub>0.44</sub> Se <sub>2</sub> | GCE | 250   | 49.7 | 0.5 M H <sub>2</sub> SO <sub>4</sub> |                                                |
| Co <sub>0.32</sub> Ni <sub>0.68</sub> S <sub>2</sub>  | GCE |       | 66.8 | 0.5 M H <sub>2</sub> SO <sub>4</sub> |                                                |
| NiS <sub>2</sub>                                      | GCE |       | 41.6 | 0.5 M H <sub>2</sub> SO <sub>4</sub> |                                                |
| NiSe <sub>2</sub>                                     | GCE | 250   | 56.9 | 0.5 M H <sub>2</sub> SO <sub>4</sub> |                                                |

\*Notes

CNT: carbon nanotube; RGO: reduced graphene oxide; NC: nanocomposite;

MGF: mesoporous graphene foams; FTO: fluorine-doped tin oxide;

GCE: glassy carbon electrode
